# Supplementary material for: Technique and model for modifying the saturable absorption (SA) properties of 2D nanofilms by considering interband exciton recombination
Source: Royal Society of Chemistry journal article supplement (doi:10.1039/c8tc00498f), 2018-01-01
Supplement: c8tc00498f1.pdf [file c8tc00498f1.pdf]

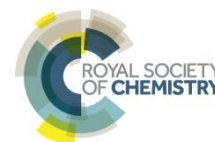

ARTICLE

## Technique and model for modifying the saturable absorption (SA) properties of 2D nanofilms by considering interband exciton recombination

Received 00th January 20xx,  
Accepted 00th January 20xx

DOI: 10.1039/x0xx00000x

www.rsc.org/ MaterialsC

Guowen Liang,<sup>†a</sup> Longhui Zeng,<sup>†b</sup> Yuen Hong Tsang,<sup>\*b</sup> Lili Tao,<sup>b</sup> Chun Yin Tang,<sup>b</sup> Ping Kwong Cheng,<sup>b</sup> Hui Long,<sup>b</sup> Xin Liu,<sup>a</sup> Ji Li,<sup>a</sup> Junle Qu<sup>a</sup> and Qiao Wen<sup>\*a</sup>

In this study, we have successfully demonstrated a method of greatly modifying the nonlinear saturable absorption (SA) properties of WS<sub>2</sub> nanofilms by controlling their thickness and morphology via magnetron sputtering deposition times. The nonlinear SA properties of these nanofilms were also investigated systematically under excitation by laser pulses with various durations in the fs, ps and ns ranges, and prominent ultrafast SA parameters were demonstrated for different pulse durations in the fs, ps and ns ranges. A pulse width-dependent theoretical model of SA that considers the effects of interband exciton recombination has now been proposed for the first time. Two analytical expressions for calculating the variation of key SA parameters (the onset fluence  $F_{on}$  and the modulation depth  $\Delta T$ ) with the excitation laser pulse width have been derived and experimentally verified. These studies open up exciting avenues for engineering the SA properties of 2D nanofilms for a wide range of laser photonic devices and applications.

### Methods

WS<sub>2</sub> films on quartz substrates were fabricated by using a magnetron sputtering method. The RF power, Ar gas pressure, and substrate temperature were controlled at 60 W, 5 mTorr, and 200 °C, respectively, during sputtering. The deposition rate was approx. 5 nm min<sup>-1</sup>, leading to film thicknesses of ~8.85 nm, ~15.7 nm and ~27.7 nm after deposition times of 1 min, 3 min and 5 min, respectively. To improve the film crystallinity, the as-prepared WS<sub>2</sub> films were annealed in an Ar atmosphere at 800 °C for 120 mins.

As shown in Fig. S1, a Ti:sapphire chirped pulse amplification (CPA) system, consisting of an oscillator, a pulse stretcher, a regenerative amplifier and a pulse compressor, was used to output 200 ps laser pulses before the pulse compressor. Pulses of 100 fs or 10 ps were produced from the compressor by changing the spacing between the pair of gratings that constitute the compressor. The 10 ns laser pulses were generated directly from the Q-switched regenerative amplifier of the CPA system. To avoid laser damage and the effects of heat, a pulse picker was employed to decrease the 1 KHz output

pulse repetition rate to 1 Hz. In addition, a motor-driven variable optical attenuator was used to regulate the laser pulse energy. The excitation laser beam was focused at the focus with a beam waist of 29 μm, located at position Z = 0, by a lens with a focal length of 15 cm. The WS<sub>2</sub> film samples were loaded onto a motorized linear stage and translated from Z = -15 to Z = 15 mm along the optical axis (the Z-axis). The pulse energies in front of and behind the sample were measured by two pyroelectric energy meters. The average energy of 10 pulses within the exposure time of 10 seconds was taken for each measurement by using a computer-controlled energy meter and mechanical shutter.

### Derivation of analytical expressions for onset fluence $F_{on}$ and the modulation depth $\Delta T$

Eq. (3) was used to derive analytical expressions for the onset fluence  $F_{on}$  and the modulation depth  $\Delta T$ . According to Eq. (3), the additional photonic energy absorbed from the excited pulse due to interband recombination can be expressed as

$$\Delta E = h\nu \cdot \Delta N = h\nu N_{on} \cdot \frac{t}{\tau} \quad (S1)$$

Without excitation, the excited state population of the direct band gap semiconductor is almost zero at room temperature. Under the threshold condition, when the input fluence is equal to  $F_{on}$ , the energy absorbed by the WS<sub>2</sub> film can be calculated as follows:

<sup>a</sup> Key Laboratory of Optoelectronic Devices and Systems of Ministry of Education and Guangdong Province, College of Optoelectronic Engineering, Shenzhen University, Shenzhen 518060, China.

<sup>b</sup> Department of Applied Physics and Materials Research Center, The Hong Kong Polytechnic University, Kowloon, Hong Kong, China.

\* Correspondence and requests for materials should be addressed to Y. H. Tsang (email: yuen.tsang@polyu.edu.hk) or to Q. Wen (email: wenqiao@szu.edu.cn). Both institutes contributed equally to this work.

<sup>†</sup> These authors contributed equally to this work.

Electronic Supplementary Information (ESI) available. See DOI: 10.1039/x0xx00000x

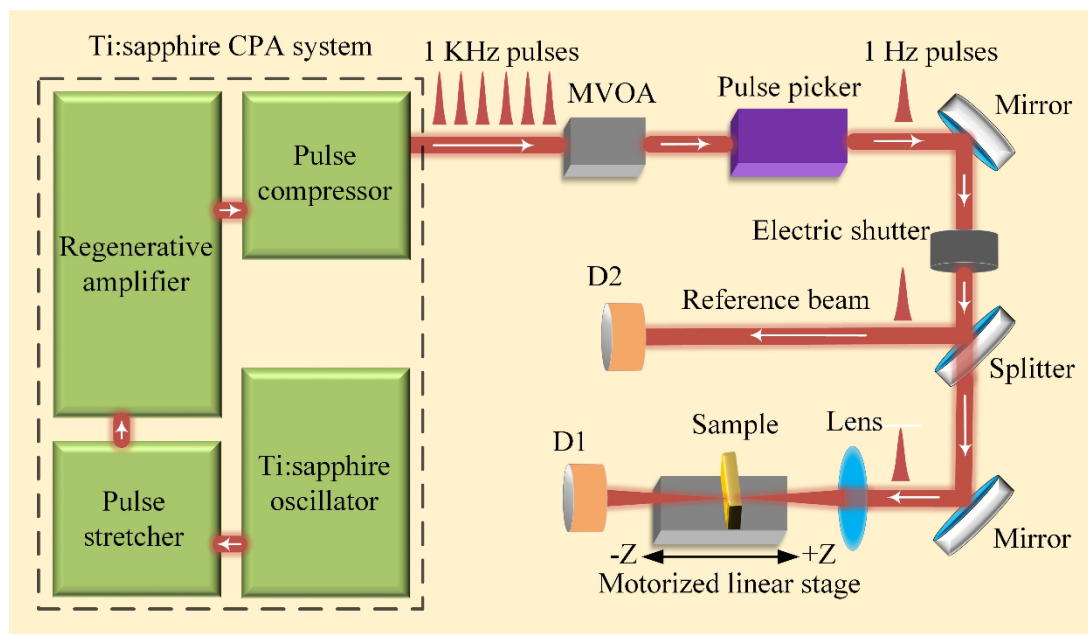

**Fig. S1** Schematic diagram for the setup of open-aperture Z-scanning. The MVOA is a motor-driven variable optical attenuator, the pulse picker consists of a Pockels cell and a Glan-Taylor prism, and D1 and D2 are pyroelectric energy meters for the signal pulses and the reference pulses, respectively.

$$F_{on} \cdot a = h\nu N_{on} + \Delta E \quad (S2)$$

where  $a = 1 - T_L$  is the linear absorption. Substituting (S1) into (S2) and simplifying produces

$$F_{on} = \frac{1}{a} \cdot h\nu N_{on} \left( 1 + \frac{t}{\tau} \right), \quad (S3)$$

where  $1/\tau = A_1 \cdot 1/\tau_1 + A_2 \cdot 1/\tau_2 + A_3 \cdot 1/\tau_3$ . According to the exciton dynamics fitting outcomes shown in the text,  $A_1 = 67.5\%$ ,  $\tau_1 = 512$  ps,  $A_2 = 26.2\%$ ,  $\tau_2 = 1311$  ps,  $A_3 = 6.3\%$ , and  $\tau_3 = 2883$  ps. Then, Eq. (S3) becomes

$$F_{on} = \frac{1}{a} \cdot h\nu N_{on} \left( 1 + \frac{t}{650} \right). \quad (S4)$$

For  $t = 0.1$  ps (100 fs),  $\frac{t}{650} = 0.000153$  is a very small value that

can be ignored. We define  $F'_{on}$  to be the value of  $F_{on}$  for  $t = 0.1$  ps and can thereby obtain

$$F'_{on} \approx \frac{1}{a} \cdot h\nu N_{on}. \quad (S5)$$

Then, expression (S3) can be rewritten as follows:

$$F_{on} \approx F'_{on} \left( 1 + \frac{t}{\tau} \right). \quad (S6)$$

Therefore, the analytical expression (4) has been verified.

Next, the analytical expression of the modulation depth  $\Delta T$  in terms of the pulse width  $t$  is derived. The SA modulation depth  $\Delta T$  is defined as follows:

$$\Delta T = \frac{T_0}{T_L} - 1 \quad (S7)$$

where  $T_L$  is the linear transmittance of the WS<sub>2</sub> film, and  $T_0$  is the maximum transmittance of the WS<sub>2</sub> film at  $z = 0$  for the Z-scan measurement.  $T_0$  is given by  $T_0 = F'_0/F_0$ , where  $F_0$  and  $F'_0$  are the laser fluences in front of and behind the WS<sub>2</sub> film at the position  $z = 0$ . Then, equation S8 can be obtained:

$$T_0 = \frac{F'_M - \Delta E}{F_0} \quad (S8)$$

where  $F'_M$  is the maximum value of  $F'_0$  for the excited pulse width  $t \rightarrow 0$ , and the additional optical energy absorbed because of interband recombination  $\Delta E \rightarrow 0$ . Combining equation (S1) and (S5), we can obtain

$$\Delta E \approx aF'_{on} \cdot \frac{t}{\tau} \quad (S9)$$

For  $t = 0.1$  ps (100 fs),  $\Delta E \approx 0.000163 \text{ mJ/cm}^2$ . This value is very small value and can be ignored. Thus  $T'_0$  is constant and equal to  $T_0$  ( $t = 0.1$  ps), and therefore  $F'_M \approx T'_0 \cdot F_0$ . Then, equation (S8) can be rewritten as

$$T_0 \approx \frac{T'_0 F_0 - aF'_{on} \cdot \frac{t}{\tau}}{F_0}. \quad (S10)$$

Inserting this expression into (S7) produces

$$\Delta T \approx \frac{T'_0 F_0 - aF'_{on} \cdot \frac{t}{\tau}}{T_L F_0} - 1. \quad (S11)$$

(S11) can be further simplified as follows:

$$\Delta T \approx \Delta T' - \frac{(1 - T_L)F'_{on}}{T_L F_0} \cdot \frac{t}{\tau}, \quad (S12)$$

where  $\Delta T'$  is constant and equal to  $\Delta T$  ( $t = 0.1$  ps). In summary, the analytical expressions (S6) and (S11) can be deduced. These expressions describe the regular variation of the SA parameters  $F_{on}$  and  $\Delta T$  with the pulse width. By utilizing these two expressions and the measured parameters for 100 fs pulse excitation, other values of  $F_{on}$  and  $\Delta T$  with respect to different pulse widths can be calculated for any other TMD material.
